# Supplementary material for: Optimizing electronic synergy of atomically dispersed dual-metal Ni–N4 and Fe–N4 sites with adjacent Fe nanoclusters for high-efficiency oxygen electrocatalysis
Source: Royal Society of Chemistry journal article supplement (doi:10.1039/d3ee03383j), 2023-12-07
Supplement: d3ee03383j1.pdf [file d3ee03383j1.pdf]

## Electronic Supplementary Information

### Optimizing Electronic Synergy of Atomically Dispersed Dual-Metal Ni-N<sub>4</sub> and Fe-N<sub>4</sub> Sites with Adjacent Fe Nanoclusters for High-efficiency Oxygen Electrocatalysis

Haibing Meng<sup>‡, \*a</sup>, Bin Wu<sup>‡, \*b</sup>, Dantong Zhang<sup>‡c</sup>, Xuhai Zhu<sup>d</sup>, Songzhu Luo<sup>e</sup>, Ya You<sup>f</sup>, Kai Chen<sup>g</sup>, Juncai Long<sup>f</sup>, Jiexin Zhu<sup>f</sup>, Liping Liu<sup>h</sup>, Shibo Xi<sup>i</sup>, Tristan Petit<sup>b</sup>, Dingsheng Wang<sup>h</sup>, Xian-Ming Zhang<sup>\*a</sup>, Zhichuan J. Xu<sup>e</sup>, Liqiang Mai<sup>\*f</sup>

---

*a.* College of Chemistry, Taiyuan University of Technology, Taiyuan 030024, P. R. China.  
E-mail: menghaibing@tyut.edu.cn; zhangxianming@tyut.edu.cn

*b.* Helmholtz-Zentrum Berlin für Materialien und Energie GmbH, Albert-Einstein-Straße 15, Berlin 12489, Germany.  
E-mail: bin.wu@helmholtz-berlin.de

*c.* Multiscale Crystal Materials Research Center, Shenzhen Institute of Advanced Technology, Chinese Academy of Sciences Shenzhen 518055, P. R. China.

*d.* State Key Laboratory of Catalysis, Dalian Institute of Chemical Physics, Chinese Academy of Sciences, Dalian, Liaoning 110623, P. R. China.

*e.* School of Materials Science and Engineering, Nanyang Technological University, 50 Nanyang Avenue, Singapore, 639798 Singapore.

*f.* State Key Laboratory of Advanced Technology for Materials Synthesis and Processing, School of Materials Science and Engineering, Wuhan University of Technology, Wuhan 430070, P. R. China.  
E-mail: mlq518@whut.edu.cn

*g.* National Synchrotron Radiation Laboratory, University of Science and Technology of China, Hefei, 230026, P. R. China.

*h.* Department of Chemistry, Tsinghua University, Beijing 100084, P. R. China.

*i.* Institute of Chemical and Engineering Sciences, Agency for Science, Technology and Research, Singapore 627833, Singapore.

<sup>‡</sup> These authors contributed equally to this work

## Experimental Procedures

### Chemicals and materials

Vulcan carbon (XC-72R) was purchased from Carbot Corporation. NiPc and FePc were brought from Alfa Aesar. Pt/C (20 wt%) was purchased from Johnson-Matthey (USA). Nafion solution D520 (5%) was purchased from Dupont Co. (USA). All the reagents and solvents were commercially available and used without further purification.

The N-C was prepared through pyrolyzing XC-72R under  $\text{NH}_3$  atmosphere (flow rate: 100 cc/min) at 800 °C for 2 h. NiFe-N-C was prepared as follows. NiPc (2.5 mg), FePc (2.5 mg) and N-C (20 mg) were mixed in 10 ml DMF and sonicated for 30 min to facilitate the dissolution and dispersion. After that, the mixture was degassed and refluxed at 120 °C under Ar atmosphere for 12 h. After cooling to room temperature, the mixture was filtrated and washed with fresh DMF and ethanol for 2~3 times, respectively. Lastly, the NiFe-N-C was obtained by pyrolyzing the mixture at 500 °C for 3 h under Ar atmosphere. The NiFe-N-C' was obtained by 3M sulfuric acid washing of the NiFe-N-C at 80 °C for 6 h. The preparations of Ni-N-C and Fe-N-C were similar to that of NiFe-N-C except that the addition of FePc and NiPc were omitted for Ni-N-C and Fe-N-C, respectively.

### Materials characterizations

X-ray diffraction (XRD) data were collected on Bruker-AXS D8-A25 ADVANCE (Cu-K $\alpha$  radiation,  $\lambda = 1.54184$  Å). The scanning electron microscopy (SEM) images were performed on ZEISS Merlin SEM (Carl Zeiss Microscopy, Munich, Germany). The transmission electron microscopy (TEM) and energy dispersive spectrometer (EDS) data were recorded on Cs-corrected FEI Titan G2 300 kV (FEI Ltd., Hillsboro, U.S.A.) and JEM 2010 (JEOL Ltd., Tokyo, Japan). Raman spectra were obtained by using a micro-Raman system with a 532 nm excitation laser (HORIBA LabRAM HR). In situ Raman spectra were recorded at different potentials during OER process in 0.1M air-saturated KOH solution by using a homemade cell. In situ ATR-FTIR was performed on a Nicolet 6700 spectroscopy with a liquid nitrogen cooled mercury-cadmium-telluride (MCT) detector using a homemade three-electrode electrolyzer in order to trace the signals of the intermediates. The spectrum resolution was 4  $\text{cm}^{-1}$  and each spectrum was collected for 16 scans. X-ray photoelectron spectroscopy (XPS) was measured using Thermo Fisher ESCALAB 250Xi. Nitrogen adsorption/desorption isotherms were measured on Quantachrome Autosorb iQ instrument at 77 K and the sample was degassed for 8 h at 373 K. The  $^{57}\text{Fe}$  Mössbauer measurement was obtained using a  $^{57}\text{Co}/\text{Rh}$ -source at room temperature in transmission mode. The values of isomer shift (IS), electric quadrupole splitting (QS), *et al.* were obtained through the least square method. The Fe and Ni L-edge X-ray absorption spectra were recorded at the BL12B beamlines of NSRL (Hefei, China). The X-ray absorption near edge structure (XANES) and the extended X-ray absorption fine structure (EXAFS) tests of Ni and Fe K-edge of the catalysts were carried out at the XAFCA beamline of Singapore Synchrotron Light Source (SSLS) in a transmission mode. The in situ X-ray absorption spectra of NiFe-N-C were recorded during OER/ORR process in 0.1 M Air/ $\text{O}_2$ -saturated KOH solution by using a homemade cell in a fluorescence mode. The Energy was calibrated with Ni foil and Fe foil references. The Data analysis and simulation were performed by the Athena and Artemis software. Inductively coupled plasma optical emission spectroscopy (ICP-OES) was performed on an Agilent 5110.

### Electrochemical measurements

The electrochemical measurements were performed on CHI 760E electrochemical workstation (Chenhua, China) with a typical three-electrode system. The Ag/AgCl (saturated KCl) electrode, platinum (Pt) wire, and rotating ring-disc electrode (RRDE, disk electrode area: 0.1256  $\text{cm}^2$ , ring electrode area: 0.1884  $\text{cm}^2$ ) with glassy carbon disk and platinum ring were used as the reference electrode, counter electrode, and working electrode, respectively. The catalyst ink was obtained by dispersing 5.0 mg catalyst powders in 950  $\mu\text{L}$  of isopropanol and 50  $\mu\text{L}$  of 5 wt.% Nafion solution and sonicating for 1 h. Then 5  $\mu\text{L}$  of ink was cast onto the polished surface of the working electrode (catalyst loading: 0.2  $\text{mg cm}^{-2}$ ). The preparation of catalyst ink of Pt/C was similar to that of prepared catalyst. Before the electrochemical measurements, the working electrode was activated by subjecting to 50 CV cycles in the potential range of 0.2-1.2 V vs the reversible hydrogen electrode (RHE) for ORR and 1.2-1.8 V vs RHE for OER with a scan rate of 100  $\text{mV s}^{-1}$ . Cyclic voltammetry (CV) measurements were performed in  $\text{N}_2$  or  $\text{O}_2$ -saturated 0.1 M KOH solution with a scan rate of 10  $\text{mV s}^{-1}$ . Linear sweep voltammetry (LSV) measurements were carried out with a scan rate of 5  $\text{mV s}^{-1}$  with different rotation rates and all the LSV tests were presented with iR compensation (95% at 0 V). Durability of catalyst was evaluated by performing different CV cycles in the potential range of 0.6-1.1 V for ORR and 1.4-1.7 V vs RHE for OER at room temperature. The chronoamperometry measurements were carried out with an electrode rotation of 1600 rpm under the potential of 0.6 V vs RHE for ORR and the initial potential at the current density of 10  $\text{mA cm}^{-2}$  for OER, respectively. The methanol tolerance tests were performed under the potential of 0.6 V vs RHE with an electrode rotation of 1600 rpm by adding 3 mL of methanol into 60 mL  $\text{O}_2$ -saturated 0.1 M KOH solution. The electrochemical active surface area (ECSA) was determined by measuring the CV curves at different scan rates (20, 40, 60, 80, and 100  $\text{mV s}^{-1}$ ) and estimated by double-layer capacitance ( $C_{dl}$ ), which can be evaluated

from the slope of the linear curves between current density differences ( $\Delta j = j_a - j_c$  at the potential of 1.03 V vs RHE) versus the scan rates. Electrochemical impedance spectra (EIS) were performed under the frequency of  $10^5 - 10^{-3}$  Hz with 5 mV voltage amplitude, and the bias potential is 0.58 V vs RHE. In situ EIS characterization was performed at different potentials during OER/ORR process to disclose the structural information of catalysts and the ion adsorption resistance ( $R_{ct}$ ) was obtained from equivalent circuit analysis. All the potentials were converted to the RHE according to the following equation:

$$E_{RHE} = E_{Ag/AgCl} + 0.197 + 0.059pH$$

The electron transfer number ( $n$ ) and yield of peroxide can be evaluated from the LSV curve of RRDE measurement at 1600 rpm according to the following equation:

$$n = 4 \frac{I_D}{I_D + I_R/N}$$

$$H_2O_2(\%) = 200 \frac{I_R/N}{I_D + (I_R/N)}$$

where  $I_D$  represents disk current and  $I_R$  represents ring current at 1.23 V vs RHE.  $N = 0.37$  is the current collection efficiency of the ring electrode.<sup>[1]</sup>

The Tafel slope was calculated according to the following equation:

$$E = a + b \log(J_K)$$

$$J_k = \frac{J \times J_L}{J_L - J}$$

where  $E$  represents the potential of LSV curve.  $a$  is the intercept and  $b$  is the Tafel slope.  $J_k$ ,  $J$  and  $J_L$  represent kinetic current density, net current density (measured), and diffusion limited current density, respectively.

The electron transfer number ( $n$ ) and ORR kinetics were evaluated by analyzing LSV curves with rotation rates of 400, 625, 900, 1225, 1600, 2025, and 2500 rpm using the Koutecky-Levich (K-L) equation:

$$\frac{1}{J} = \frac{1}{J_L} + \frac{1}{J_K} = \frac{1}{B\omega^{1/2}} + \frac{1}{J_K}$$

$$\text{with } B = 0.62nFC_0(D_0)^{2/3}\nu^{-1/6}$$

where  $\omega$  represents the rotation speed (rad s<sup>-1</sup>), while  $F$ ,  $C_0$ ,  $D_0$  and  $\nu$  are the Faraday constant (96485 C mol<sup>-1</sup>), concentration of O<sub>2</sub> ( $1.2 \times 10^{-6}$  mol cm<sup>-3</sup> in O<sub>2</sub>-saturated 0.1 M KOH), O<sub>2</sub> diffusion coefficient ( $1.9 \times 10^{-5}$  cm<sup>2</sup> s<sup>-1</sup>) and kinematic viscosity of the solution (0.01 cm<sup>2</sup> s<sup>-1</sup>).<sup>[36]</sup>

### Zn-air battery measurements

The performance of Zn-air battery was investigated on a LAND-CT2001A testing device. The Zn-air battery was assembled using a polished Zn plate, a catalyst ink-modified gas diffusion electrode (hydrophobic carbon paper) and a 6 M KOH + 0.2 M Zn(Ac)<sub>2</sub> solution as electrolyte. The catalyst ink was prepared following the same procedure as described above. The catalyst content on carbon paper was 1 mg cm<sup>-2</sup>. For Pt/C+IrO<sub>2</sub>, their respective content on carbon paper was 0.5 mg cm<sup>-2</sup> (the total catalysts loading: 1 mg cm<sup>-2</sup>). The open circuit potential, charge and discharge polarization curves were performed on CHI760E electrochemical workstation (the scan rate was 5 mV s<sup>-1</sup> for polarization curves). The specific capacities of Zn-air batteries were performed at 10 mA cm<sup>-2</sup> with long time discharge. The galvanostatic cycling stabilities were conducted at the current densities of 10 mA cm<sup>-2</sup> and 20 mA cm<sup>-2</sup> with 5 min discharge and 5 min charge time for each cycle.

### Computational methods

All DFT calculations were performed using Vienna ab initio simulation package with projector augmented wave (PAW) pseudopotentials. The Perdew-Burke-Ernzerhof (PBE) exchange-correlation functional was used, and cutoff energy for the plane-wave basis set was set to 500 eV. The k-point sampling was obtained from the Monkhorst-Pack scheme with a  $3 \times 3 \times 1$  mesh. The convergence criteria of energy and forces were set to  $1 \times 10^{-5}$  eV and 0.03 eV Å<sup>-1</sup>, respectively. The vacuum layer was set at 15 Å to avoid the layer interaction.

The Gibbs free energy can be expressed as

$$\Delta G = \Delta E + \Delta ZPE - T\Delta S$$

where  $\Delta E$ ,  $\Delta ZPE$ , and  $\Delta S$  are the reaction energy calculated by the DFT methods, the changes in zero-point energies, and the entropy during the reaction, respectively.  $T$  is the temperature (298.15 K).

## Supplementary Figures and Tables

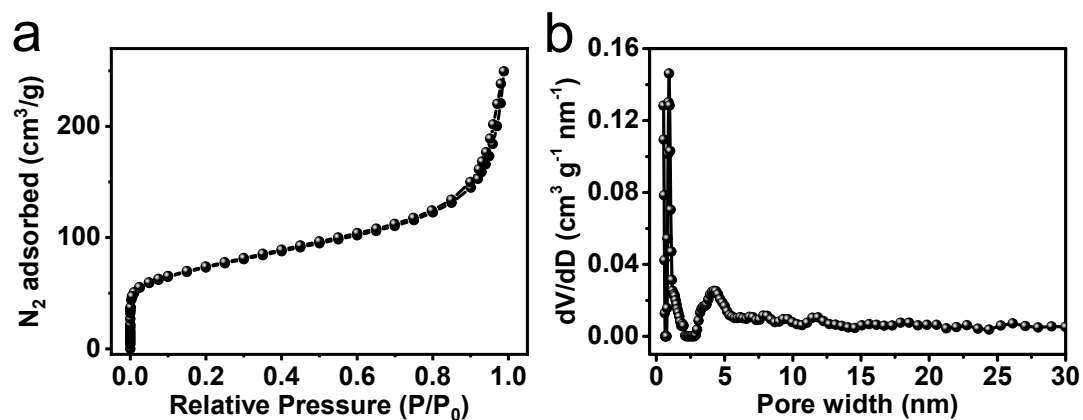

**Figure S1.**  $N_2$  adsorption/desorption isotherms (a) and pore size distribution (b) of N-C.

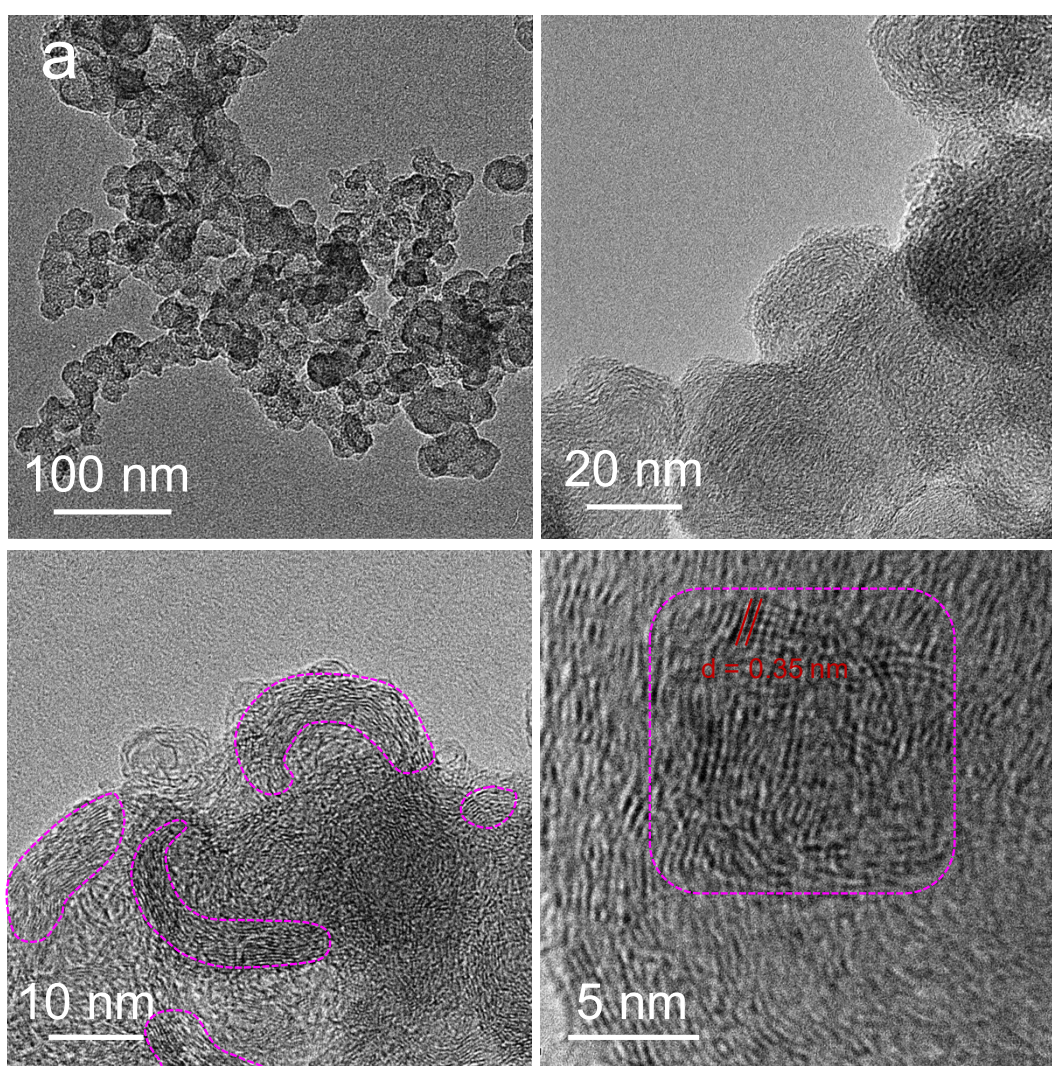

**Figure S2.** TEM and HRTEM images (a-d) of NiFe-N-C. The pink circles indicate the existence of crystalline carbon layers and the interplanar spacing of carbon is 0.35 nm.

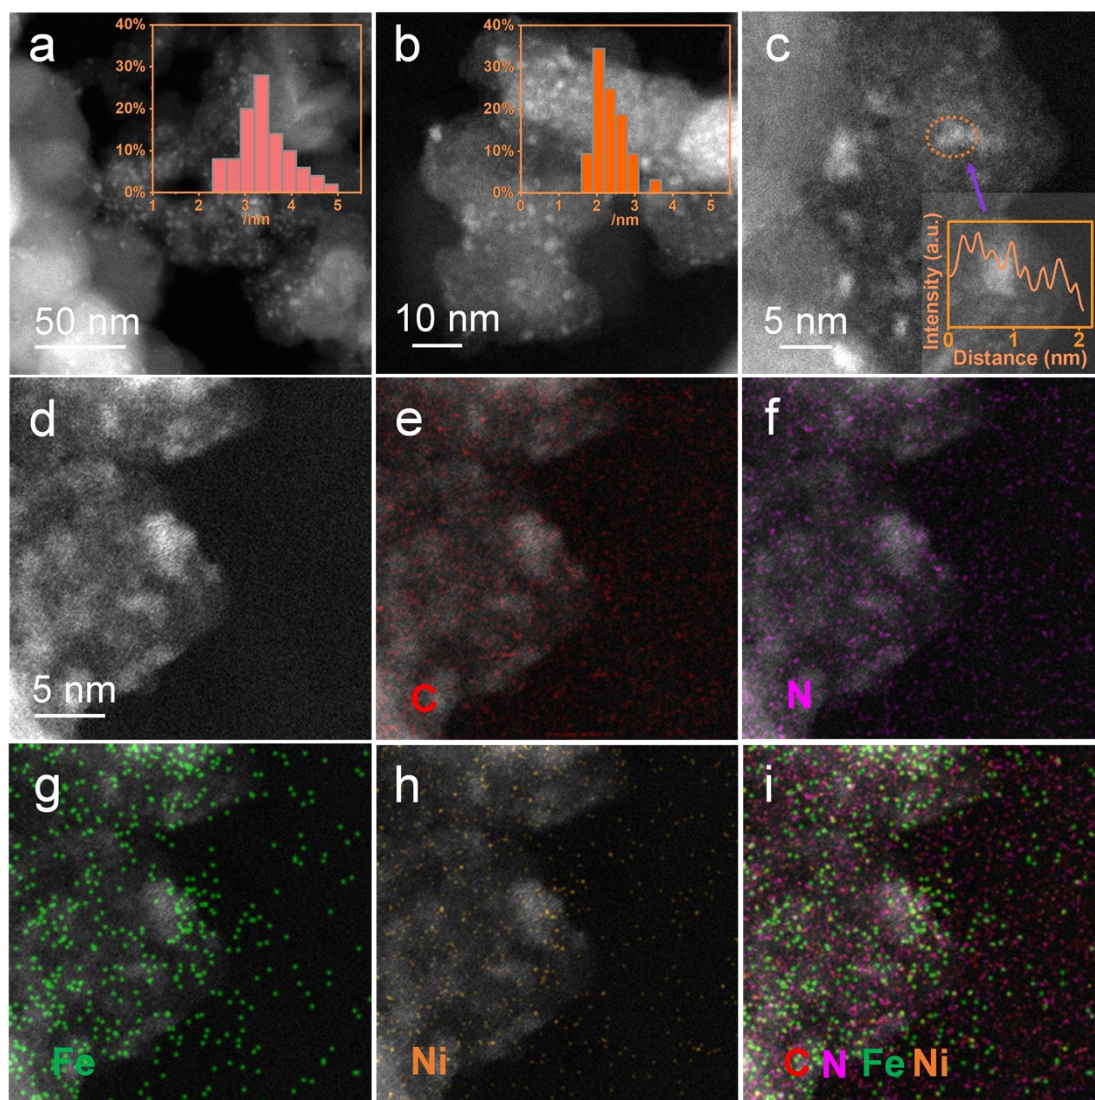

**Figure S3.** (a-c) HAADF-STEM image of NiFe-N-C. Insets in Figure S3a and S3b disclose the size distribution of the Fe nanoclusters. Inset in Figure S3c discloses the interplanar spacing of the Fe nanoclusters. (d) HAADF-STEM images of NiFe-N-C and corresponding EDS elemental mapping of C (e), N (f), Fe (g) and Ni (h) and overlaid C, N, Fe and Ni (i).

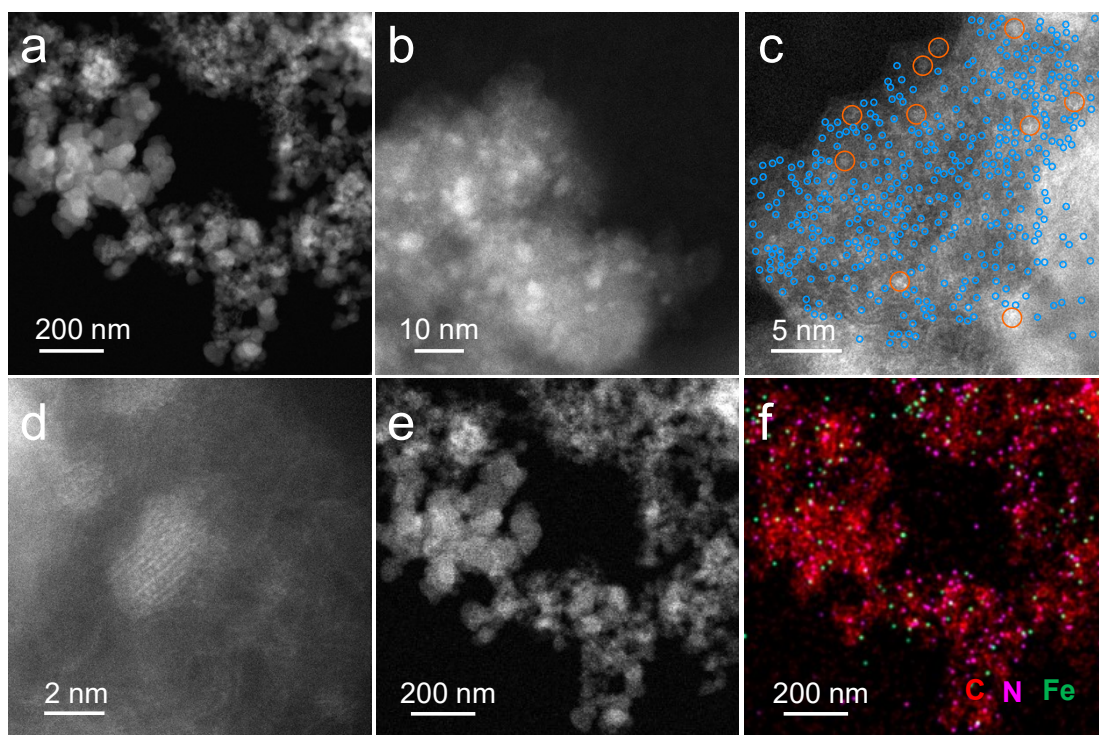

**Figure S4.** (a-d) HAADF-STEM images of Fe-N-C. (e) HAADF-STEM image of Fe-N-C and (f) corresponding EDS elemental mapping of carbon, nitrogen, and iron.

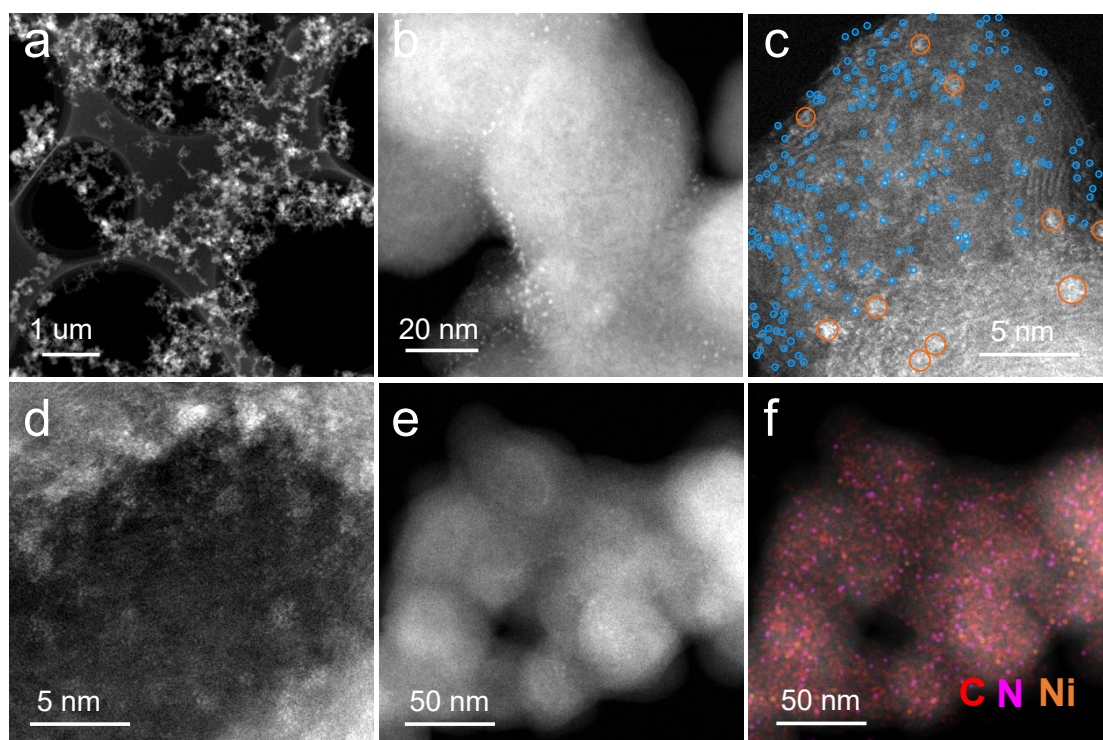

**Figure S5.** (a-d) HAADF-STEM images of Ni-N-C. (e) HAADF-STEM image of Ni-N-C and (f) corresponding EDS elemental mapping of carbon, nitrogen, and nickel.

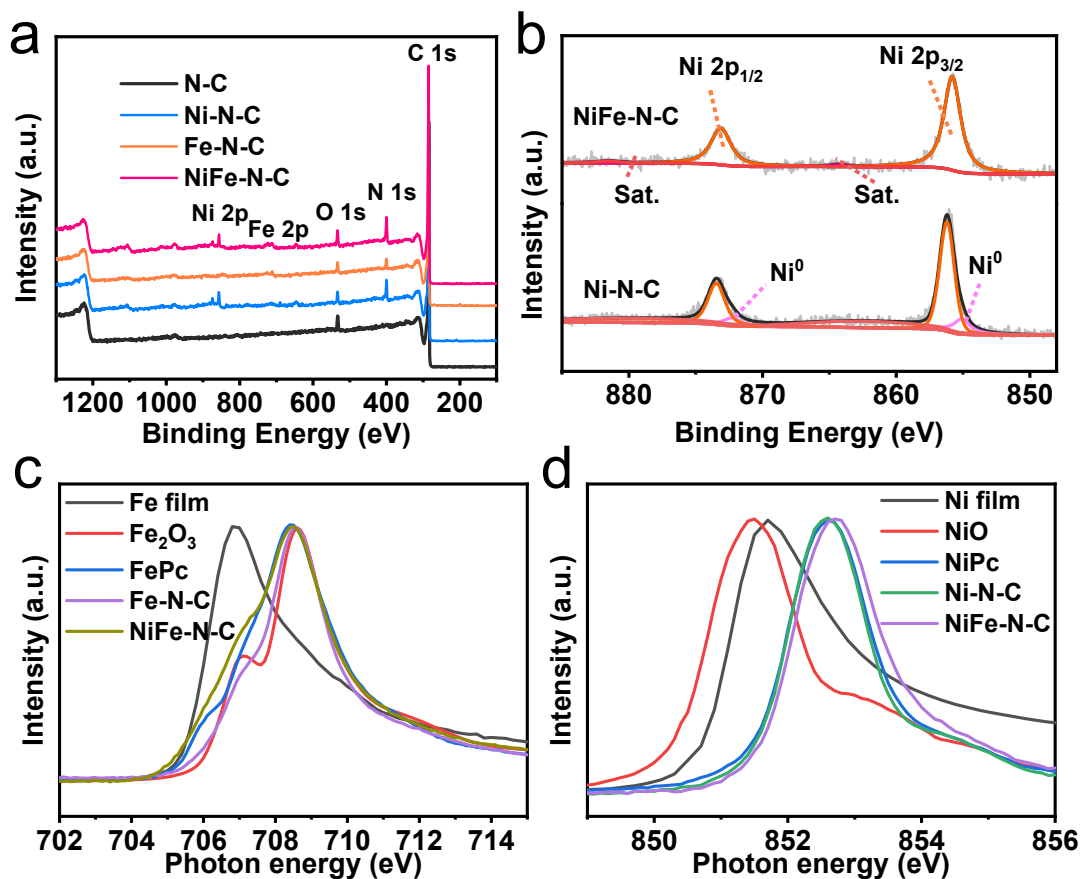

**Figure S6.** (a) XPS surveys of N-C, Ni-N-C, Fe-N-C and NiFe-N-C. (b) Ni 2p XPS spectra of Fe-N-C and NiFe-N-C. (c) Fe L<sub>3</sub>-edge XAS spectra of Fe film, Fe<sub>2</sub>O<sub>3</sub>, FePc, Fe-N-C and NiFe-N-C. (d) Ni L<sub>3</sub>-edge XAS spectra of Ni film, NiO, NiPc, Ni-N-C and NiFe-N-C.

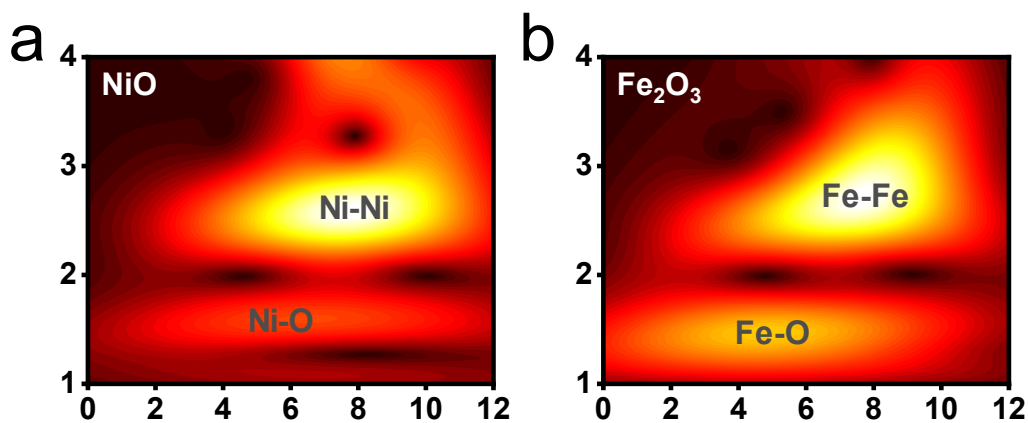

**Figure S7.** Wavelet transform of the  $k^3$ -weighted EXAFS data of Ni K-edge for NiO (a) and Fe K-edge for Fe<sub>2</sub>O<sub>3</sub> (b).

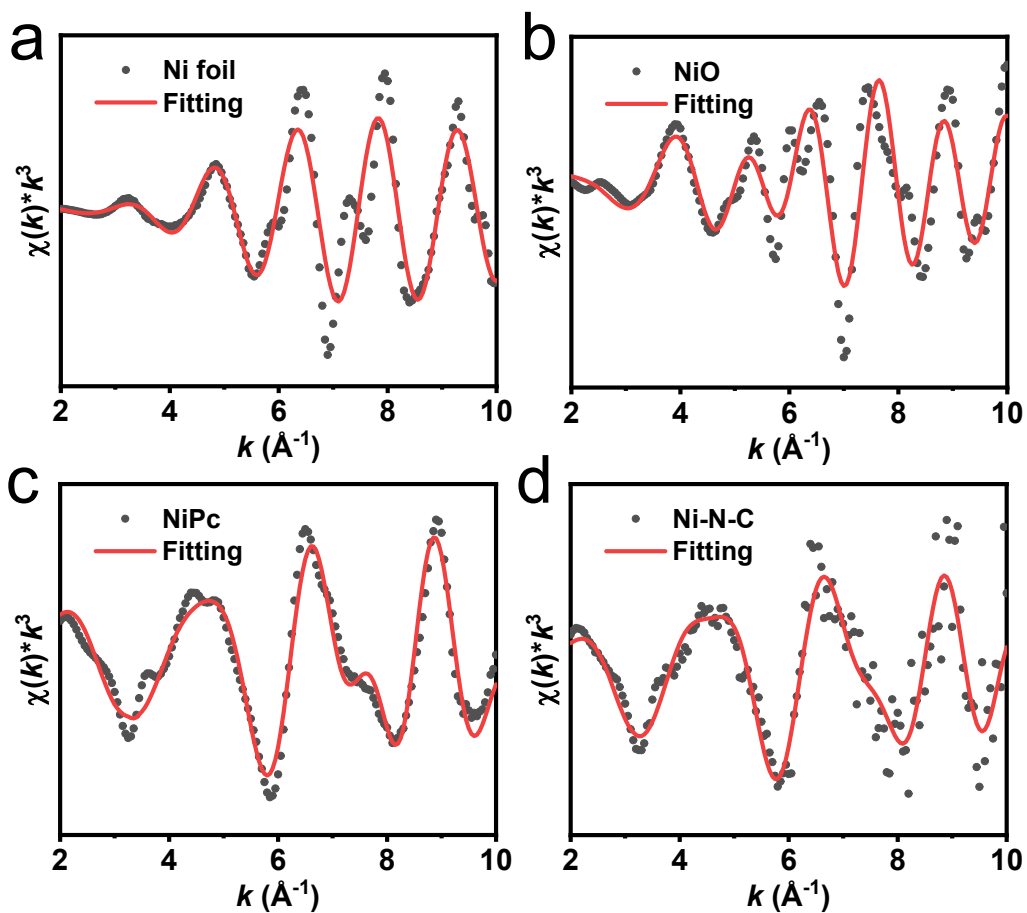

**Figure S8.** Experimental and fitting FT-EXAFS of Ni K-edge for Ni foil (a), NiO (b), NiPc (c) and Ni-N-C (d) at k space.

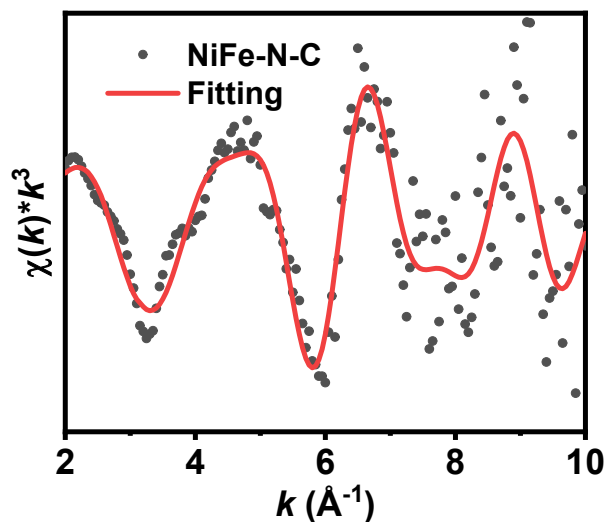

**Figure S9.** Experimental and fitting FT-EXAFS curves of Ni K-edge for NiFe-N-C at k space.



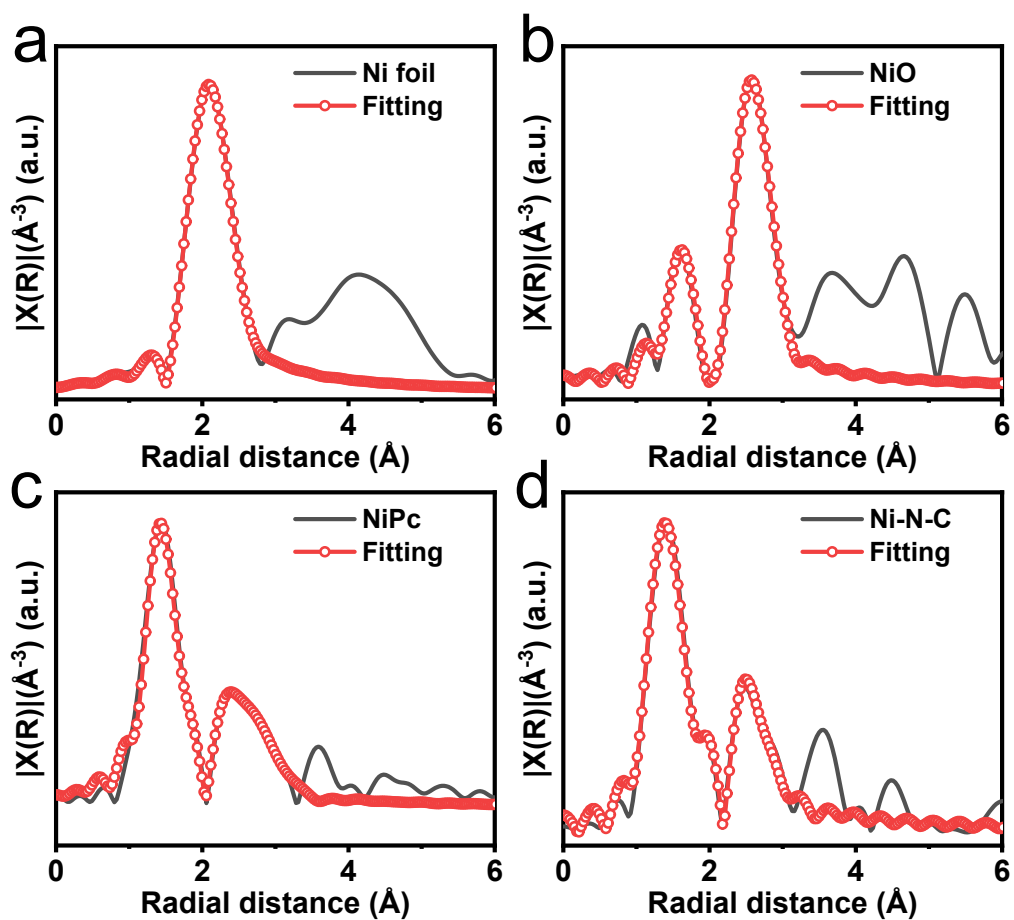

**Figure S10.** Experimental and fitting FT-EXAFS curves of Ni K-edge for Ni foil (a), NiO (b), NiPc (c) and Ni-N-C (d) at R space.

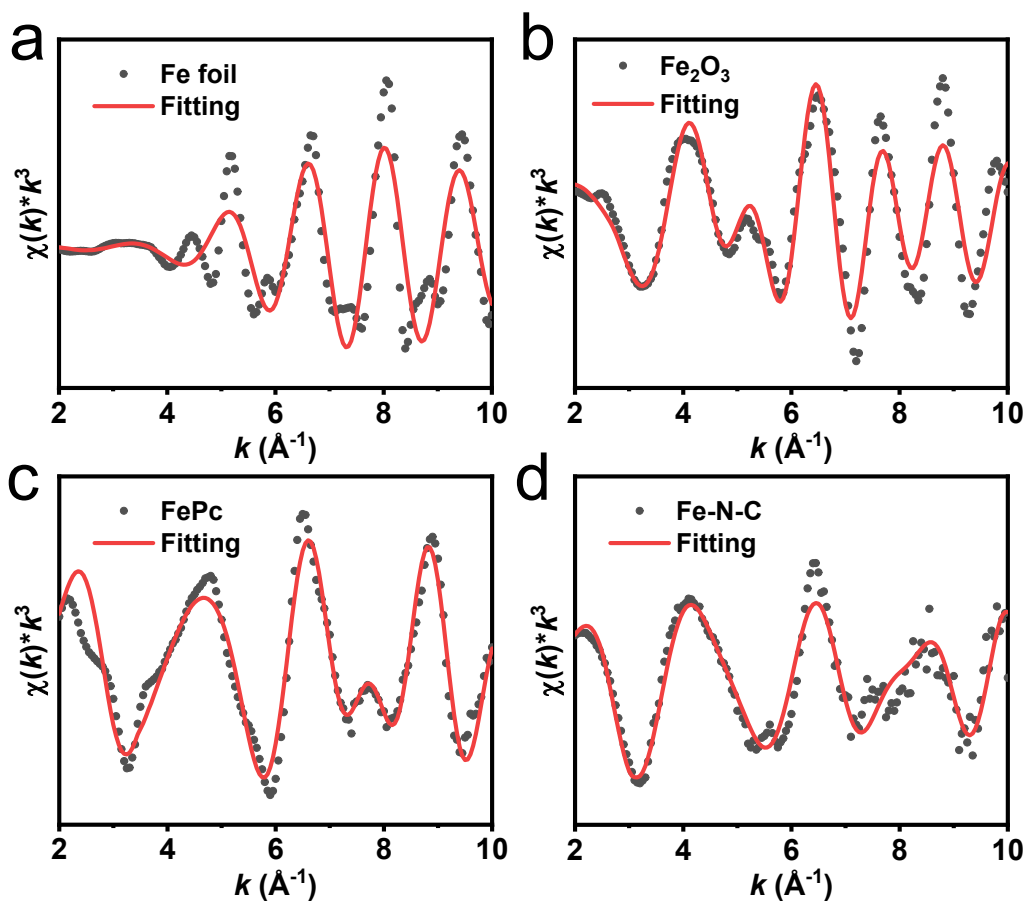

**Figure S11.** Experimental and fitting FT-EXAFS curves of Fe K-edge for Fe foil (a),  $\text{Fe}_2\text{O}_3$  (b), FePc (c) and Fe-N-C (d) at k space.

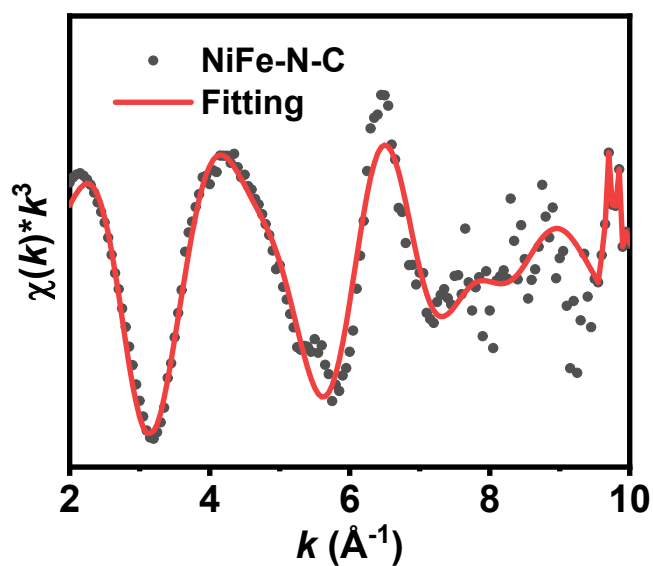

**Figure S12.** FT-EXAFS fitting curves of Fe K-edge for NiFe-N-C at k space.

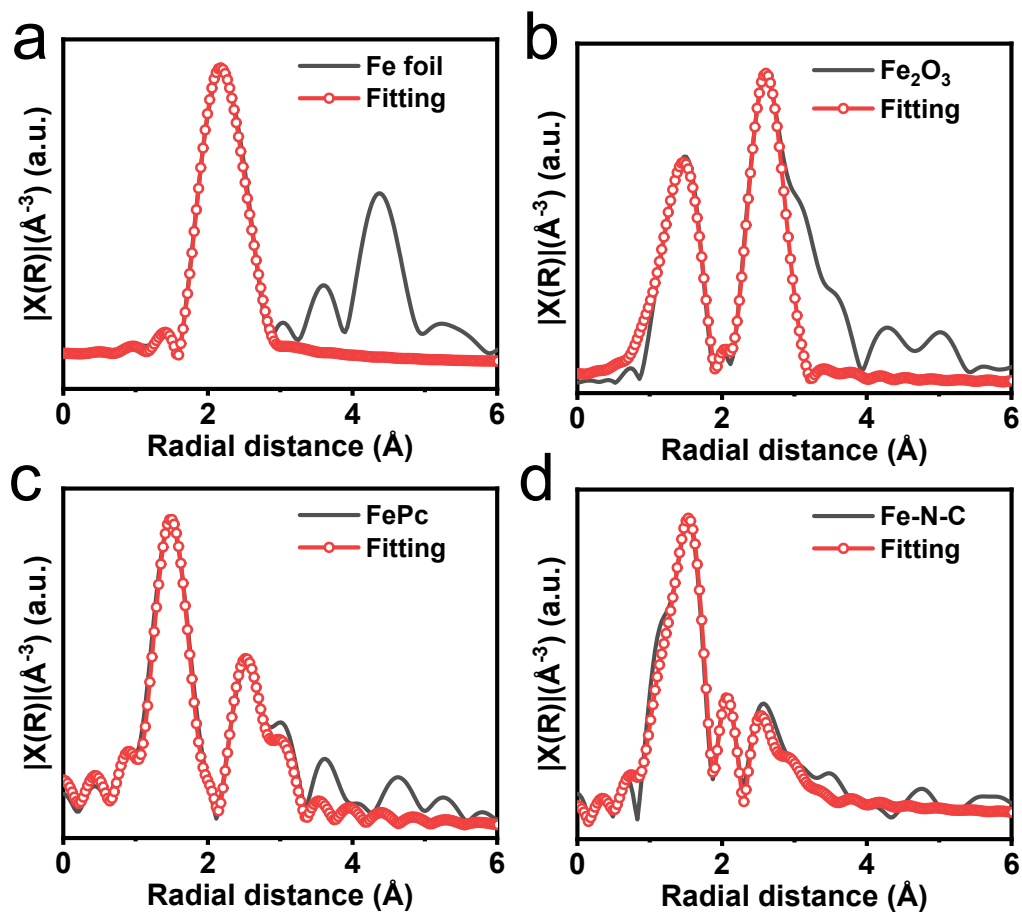

**Figure S13.** Experimental and fitting FT-EXAFS curves of Fe K-edge for Fe foil (a),  $\text{Fe}_2\text{O}_3$  (b), FePc (c) and Fe-N-C (d) at R space.

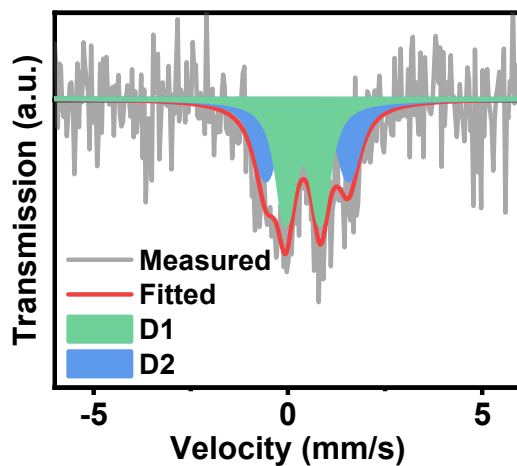

**Figure S14.**  $^{57}\text{Fe}$  Mössbauer spectra of NiFe-N-C.

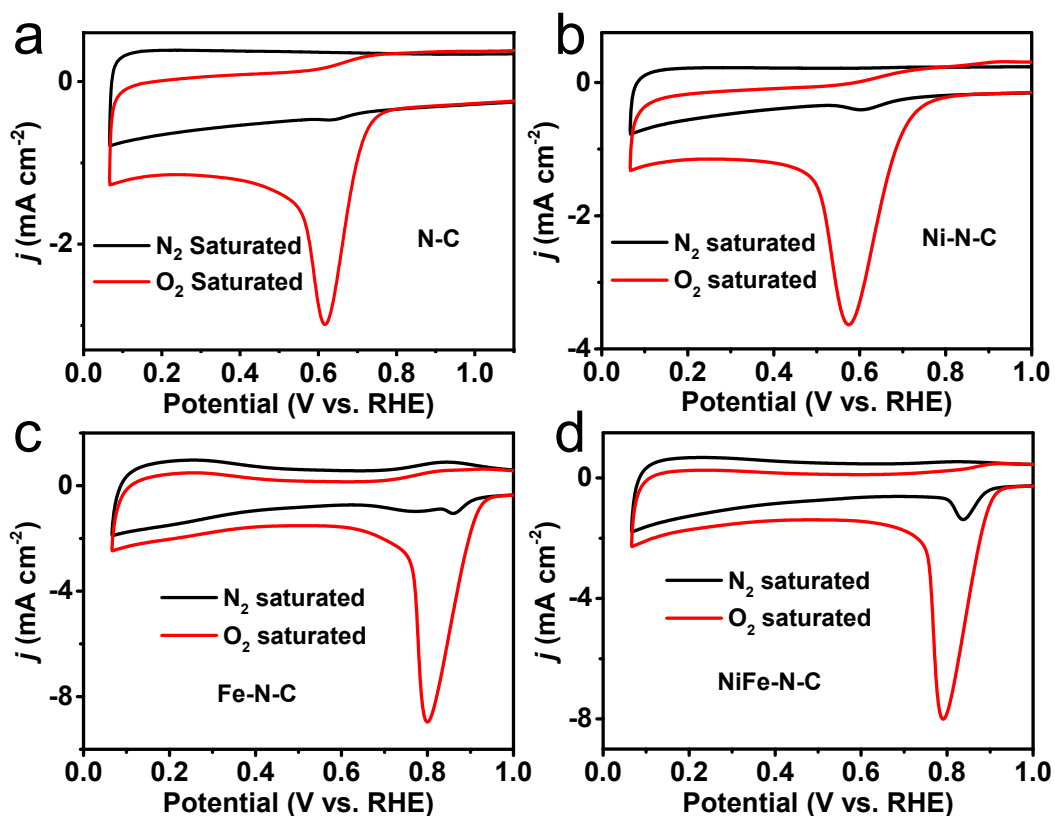

**Figure S15.** Cyclic voltammety curves of N-C (a), Ni-N-C (b), Fe-N-C (c) and NiFe-N-C (d) in  $N_2/O_2$  saturated 0.1 M KOH with a scanning rate of  $5 \text{ mV s}^{-1}$  at 1600 rpm.

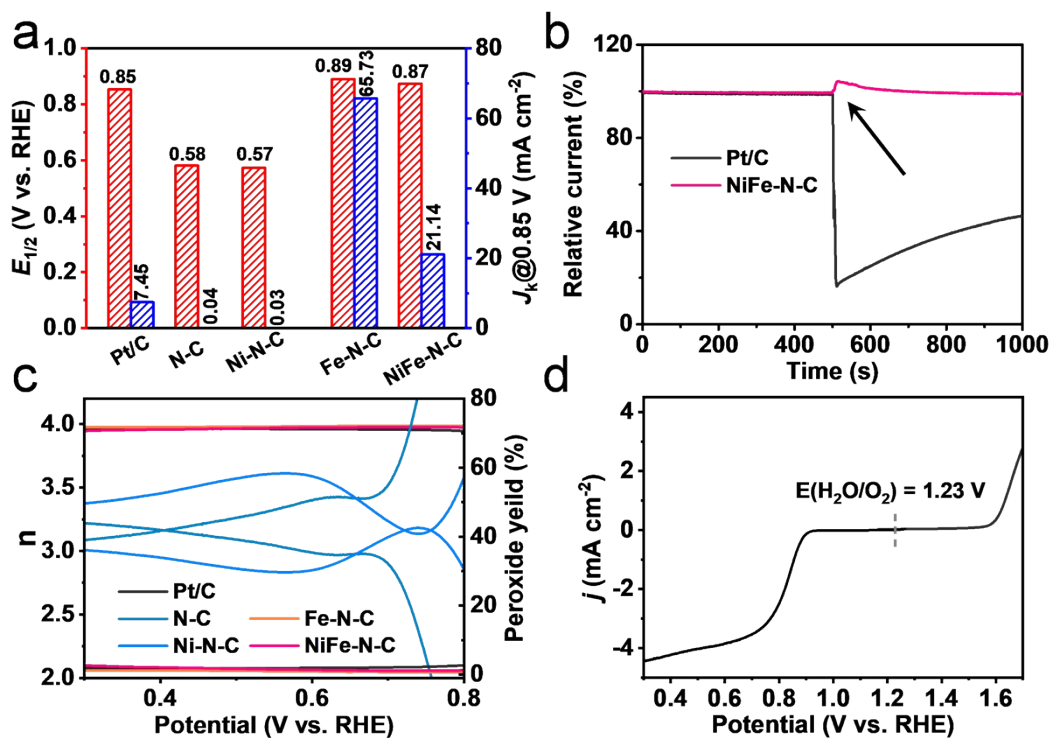

**Figure S16.** (a)  $E_{1/2}$  and  $J_k$  at 0.85 V vs RHE for commercial Pt/C and NiFe-N-C. (b) The chronoamperometric plots at 0.6 V vs RHE for commercial Pt/C and NiFe-N-C with a

rotation rate of 1600 rpm. The arrow represents the addition of methanol. (c) Electron transfer number ( $n$ ) and  $\text{H}_2\text{O}_2$  yields of Pt/C, N-C, Ni-N-C, Fe-N-C and NiFe-N-C. (d) OER/ORR polarization curves of NiFe-N-C\* in 0.1 M air/ $\text{O}_2$ -saturated KOH with a scanning rate of  $5 \text{ mV s}^{-1}$  at 1600 rpm.

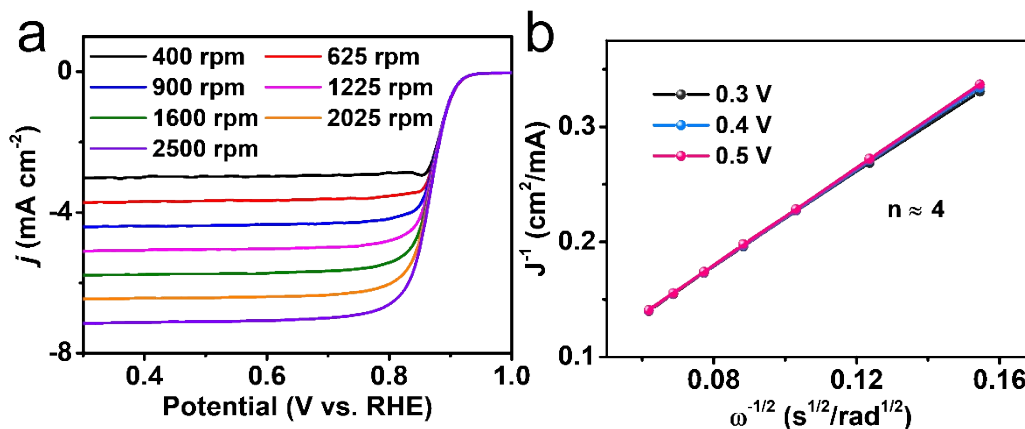

**Figure S17.** (a) ORR polarization curves of NiFe-N-C in 0.1 M  $\text{O}_2$ -saturated KOH with a scanning rate of  $5 \text{ mV s}^{-1}$  at different rotating speeds and (b) corresponding Koutecky-Levich plots at different potentials.

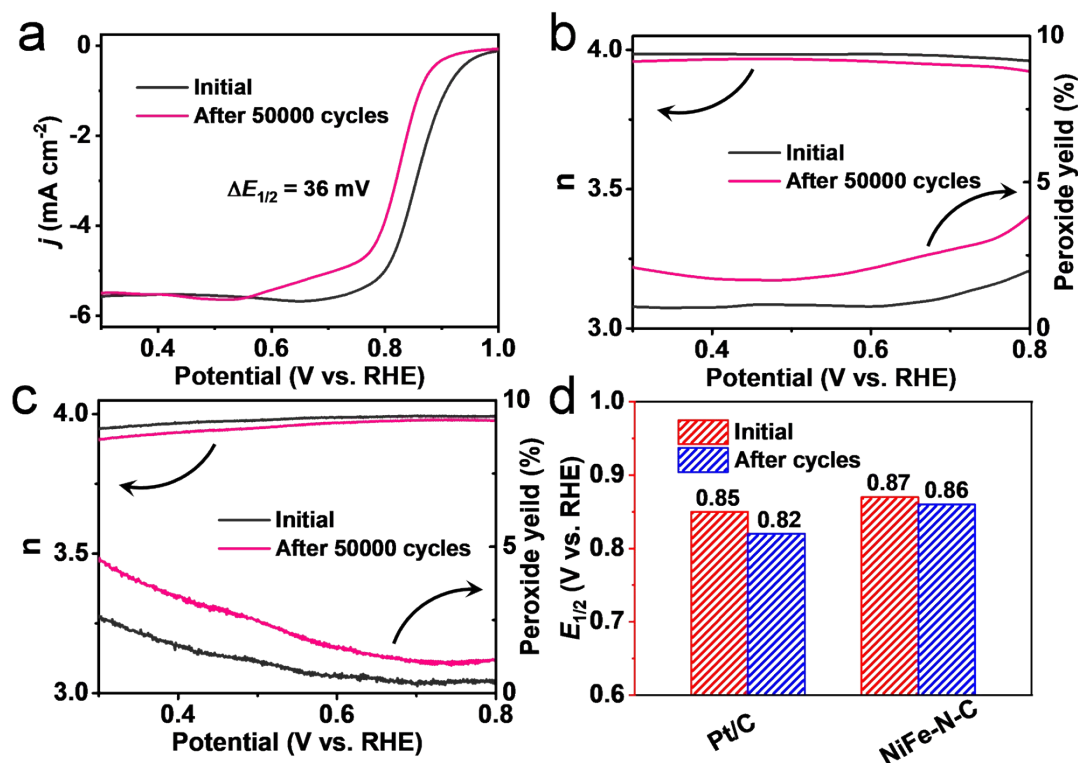

**Figure S18.** (a) ORR polarization curves of commercial Pt/C before and after 50000 potential cycles in 0.1 M  $\text{O}_2$ -saturated KOH with a scanning rate of  $5 \text{ mV s}^{-1}$  at 1600 rpm. (b) Electron transfer number ( $n$ ) and  $\text{H}_2\text{O}_2$  yields of commercial Pt/C before and after 50000

potential cycles. (c) Electron transfer number ( $n$ ) and  $\text{H}_2\text{O}_2$  yields of commercial NiFe-N-C before and after 50000 potential cycles. (d) The changes of  $E_{1/2}$  for commercial Pt/C and NiFe-N-C before and after 50000 potential cycles.

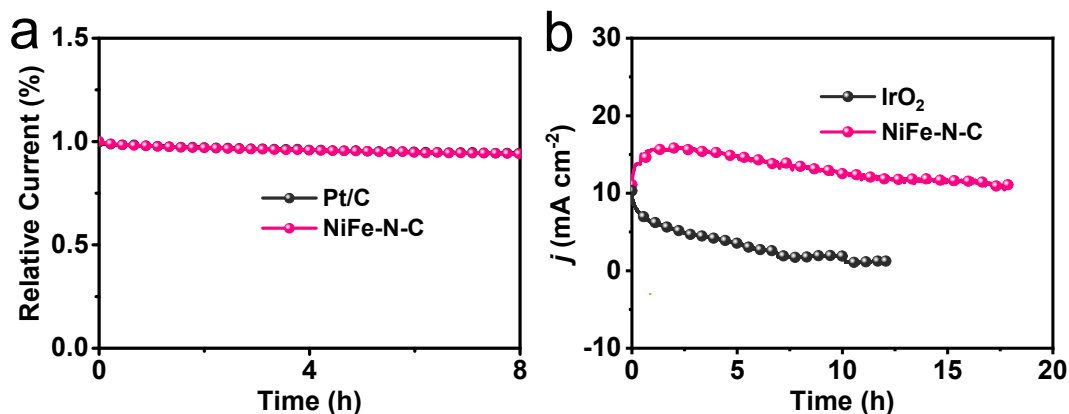

**Figure S19.** (a) Chronoamperometric curves of commercial Pt/C and NiFe-N-C at 0.6 V vs RHE for ORR in 0.1 M O<sub>2</sub>-saturated KOH with an electrode rotation of 1600 rpm. (b) Chronoamperometric curves of commercial Pt/C and NiFe-N-C for OER in 0.1 M air-saturated KOH with an electrode rotation of 1600 rpm.

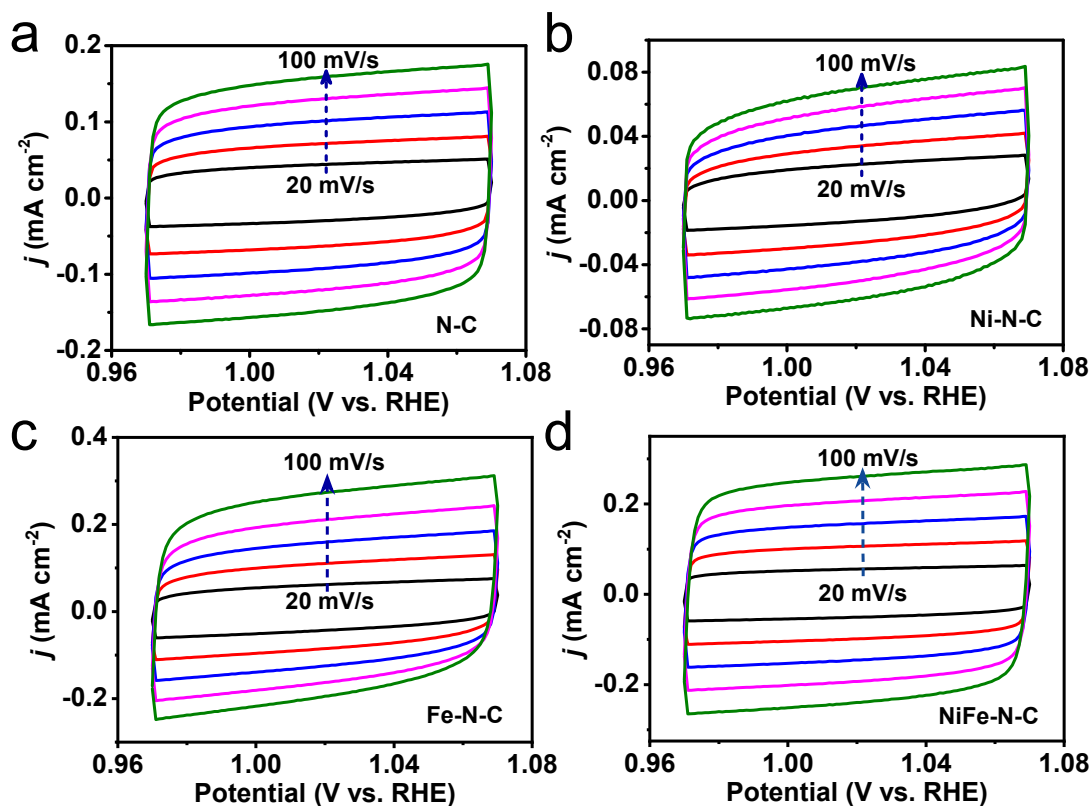

**Figure S20.** Cyclic voltammograms of N-C (a), Ni-N-C (b), Fe-N-C (c) and NiFe-N-C (d) at different scan rates in the region of 0.97~1.07 V vs RHE in 0.1 M air-saturated KOH.

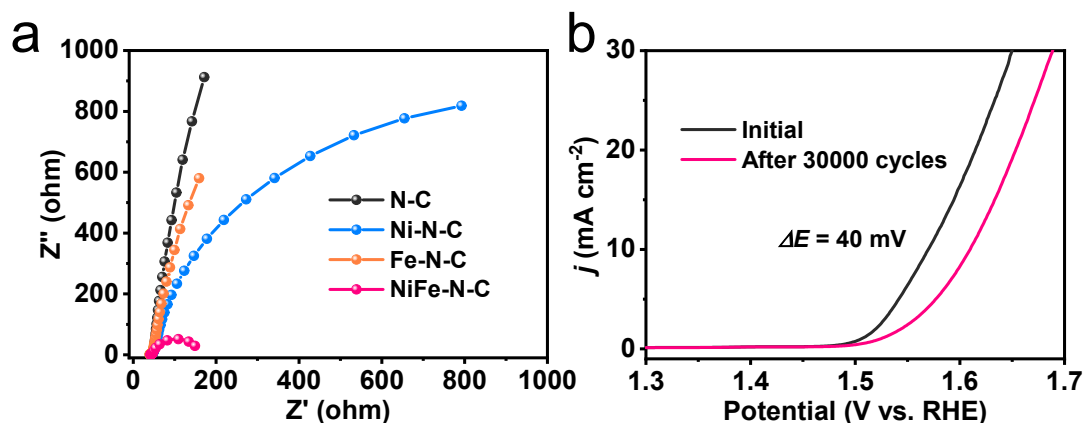

**Figure S21.** (a) Electrochemical impedance spectra (EIS) of N-C, Ni-N-C, Fe-N-C and NiFe-N-C at the potential of 0.58 V vs RHE. (b) OER polarization curves of commercial IrO<sub>2</sub> before and after 30000 potential cycles between 1.47 and 1.67 V in 0.1 M air-saturated KOH with an electrode rotation of 1600 rpm,  $\Delta E=40$  mV was determined at the current density of 10 mA cm<sup>-2</sup>.

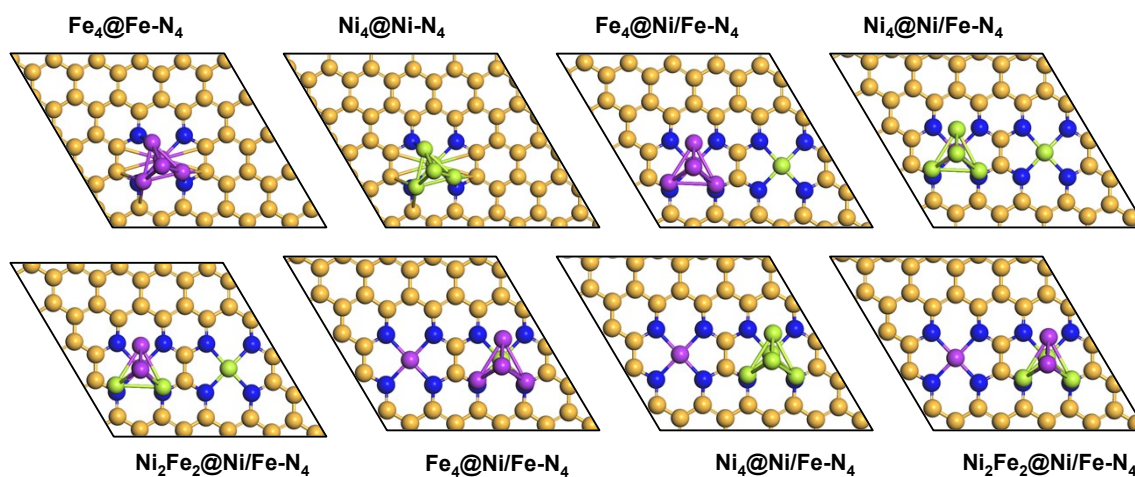

**Figure S22.** Atomic models of Fe<sub>4</sub>@Fe-N<sub>4</sub> (Fe<sub>4</sub> on Fe-N<sub>4</sub> site), Ni<sub>4</sub>@Ni-N<sub>4</sub> (Ni<sub>4</sub> on Ni-N<sub>4</sub> site), Fe<sub>4</sub>@Ni/Fe-N<sub>4</sub> (Fe<sub>4</sub> on Fe-N<sub>4</sub> site and Ni-N<sub>4</sub> site respectively), Ni<sub>4</sub>@Ni/Fe-N<sub>4</sub> (Ni<sub>4</sub> on Fe-N<sub>4</sub> site and Ni-N<sub>4</sub> site respectively), Ni<sub>2</sub>Fe<sub>2</sub>@Ni/Fe-N<sub>4</sub> (Ni<sub>2</sub>Fe<sub>2</sub> on Fe-N<sub>4</sub> site and Ni-N<sub>4</sub> site respectively) systems.

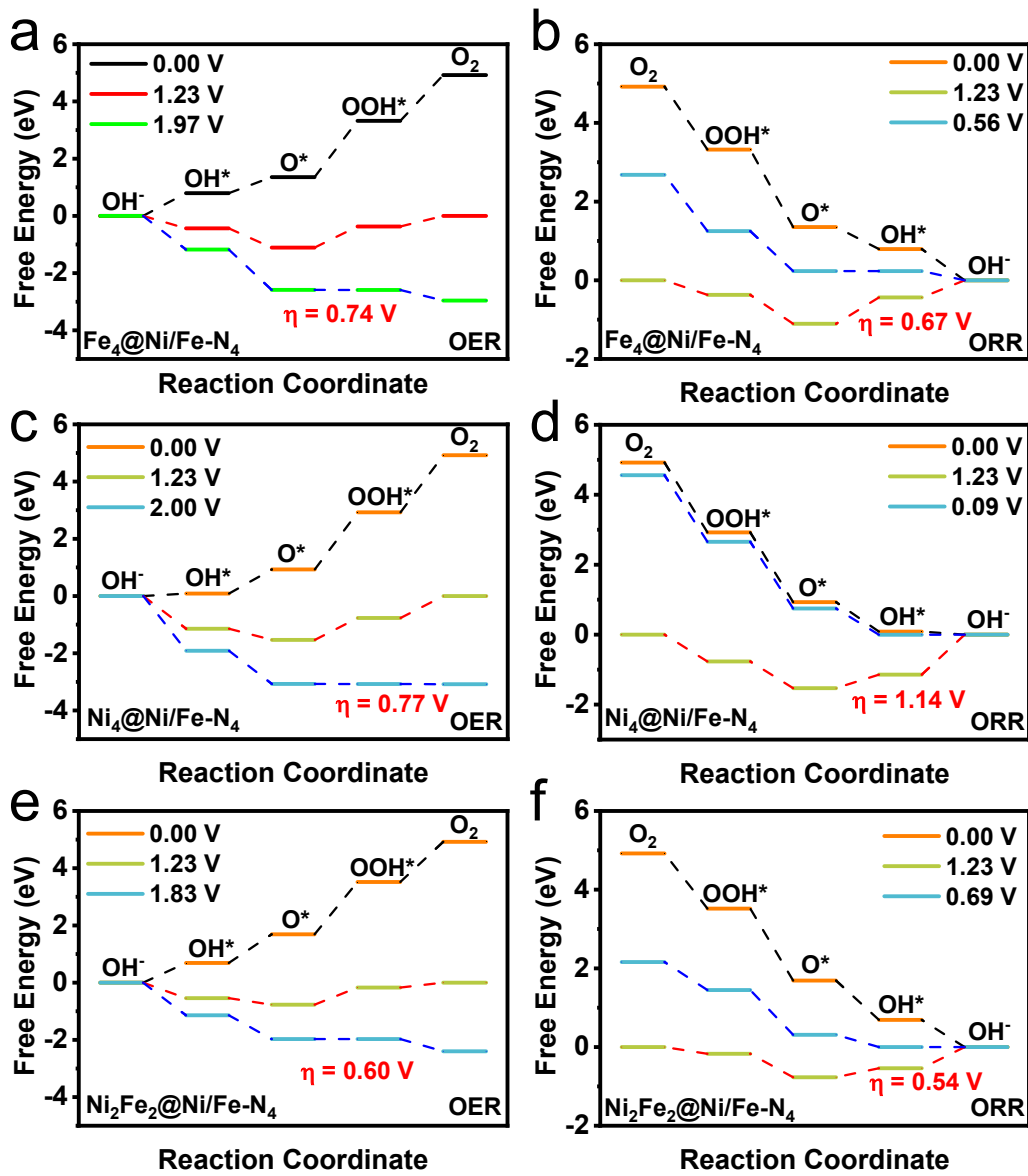

**Figure S23.** Gibbs free energy diagrams of OER on (a)  $\text{Fe}_4\text{@Ni/Fe-N}_4$ , (c)  $\text{Ni}_4\text{@Ni/Fe-N}_4$  and (e)  $\text{Ni}_2\text{Fe}_2\text{@Ni/Fe-N}_4$  and ORR on (b)  $\text{Fe}_4\text{@Ni/Fe-N}_4$ , (d)  $\text{Ni}_4\text{@Ni/Fe-N}_4$  and (f)  $\text{Ni}_2\text{Fe}_2\text{@Ni/Fe-N}_4$ . The  $\text{Fe}_4$ ,  $\text{Ni}_4$  and  $\text{Ni}_2\text{Fe}_4$  clusters are assembled on Fe- $\text{N}_4$  site.



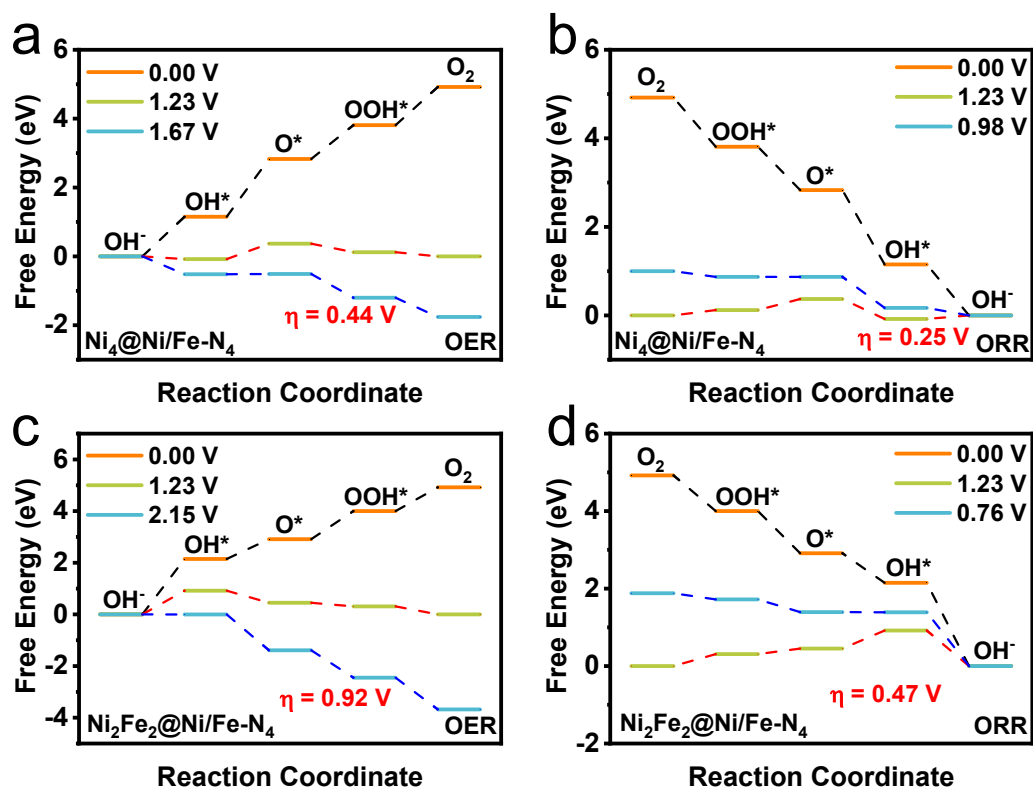

**Figure S24.** Gibbs free energy diagrams of OER on (a) Ni<sub>4</sub>@Ni/Fe-N<sub>4</sub> and (c) Ni<sub>2</sub>Fe<sub>2</sub>@Ni/Fe-N<sub>4</sub> and ORR on (b) Ni<sub>4</sub>@Ni/Fe-N<sub>4</sub> and (d) Ni<sub>2</sub>Fe<sub>2</sub>@Ni/Fe-N<sub>4</sub>. The Ni<sub>4</sub> and Ni<sub>2</sub>Fe<sub>2</sub> clusters are assembled on Ni-N<sub>4</sub> site.

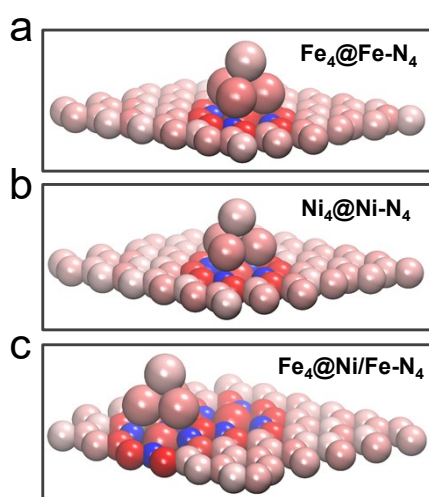

**Figure S25.** Bader charge of Fe<sub>4</sub>@Fe-N<sub>4</sub> (Fe<sub>4</sub> on Fe-N<sub>4</sub> site), Ni<sub>4</sub>@Ni-N<sub>4</sub> (Ni<sub>4</sub> on Ni-N<sub>4</sub> site), and Fe<sub>4</sub>@Ni/Fe-N<sub>4</sub> (Fe<sub>4</sub> on Ni-N<sub>4</sub> site). Red exhibit the increase of charge number and blue exhibit the decrease of charge number.

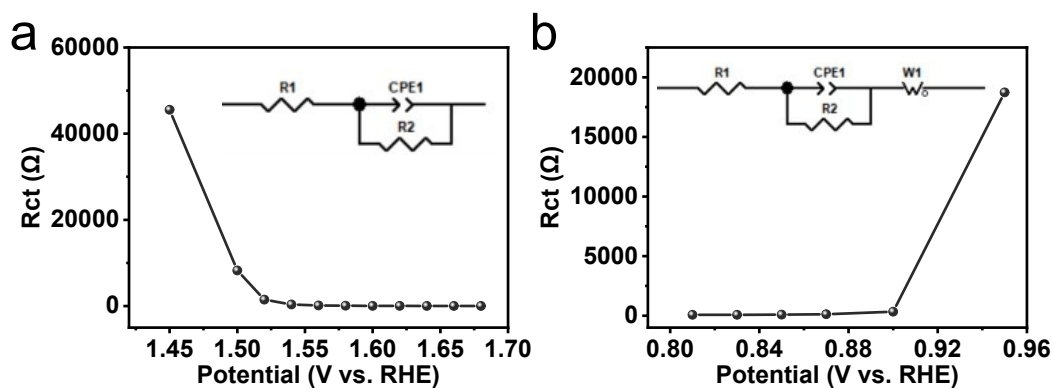

**Figure S26.** Response of the ion adsorption resistance ( $R_{ct}$ ) at different potentials for NiFe-N-C electrocatalysts during OER (a) and ORR (b) process. The insets show the accurate equivalent circuits for the charge transfer resistance analysis.

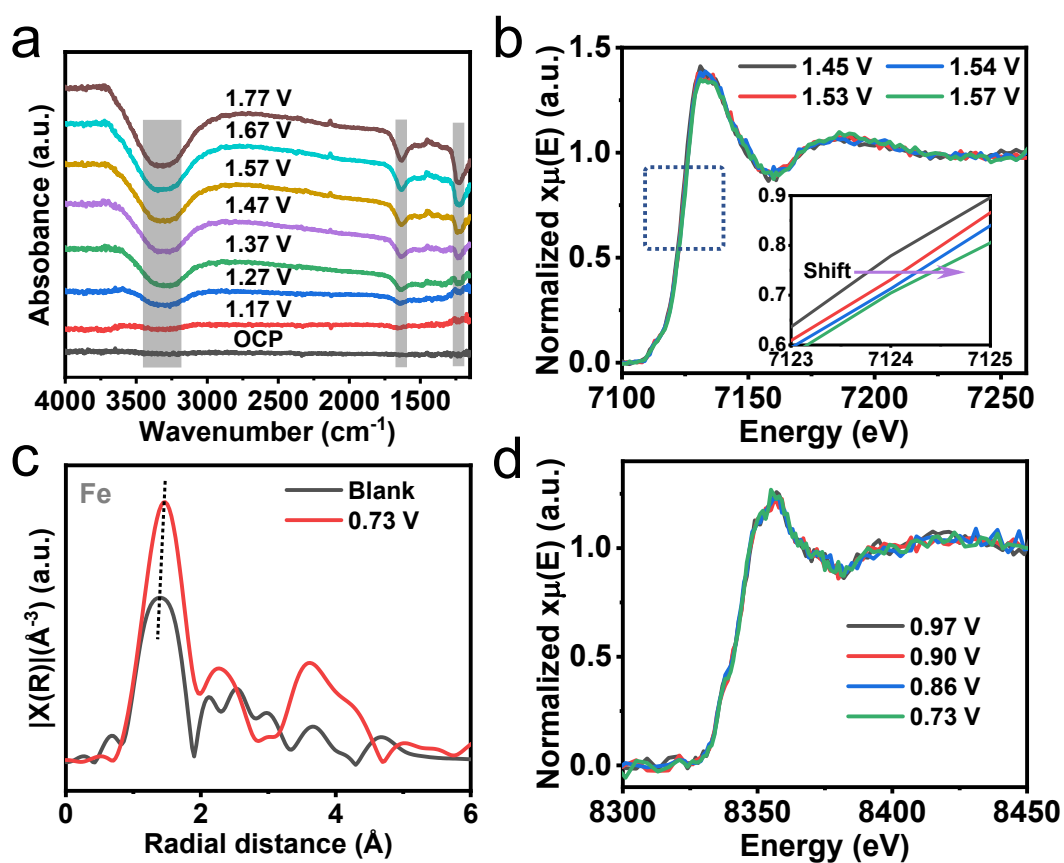

**Figure S27.** (a) In situ FTIR spectra of NiFe-N-C in 0.1 M  $O_2$ -saturated KOH during OER process. (b) In situ Fe K-edge XANES spectra of NiFe-N-C in 0.1 M air-saturated KOH during OER process. (c) Fe K-edge  $k^3$ -weighted FT-EXAFS spectra of pristine NiFe-N-C and NiFe-N-C at 0.73 V under ORR condition at R space. (d) In situ Ni K-edge XANES spectra of NiFe-N-C in 0.1 M  $O_2$ -saturated KOH during ORR process.

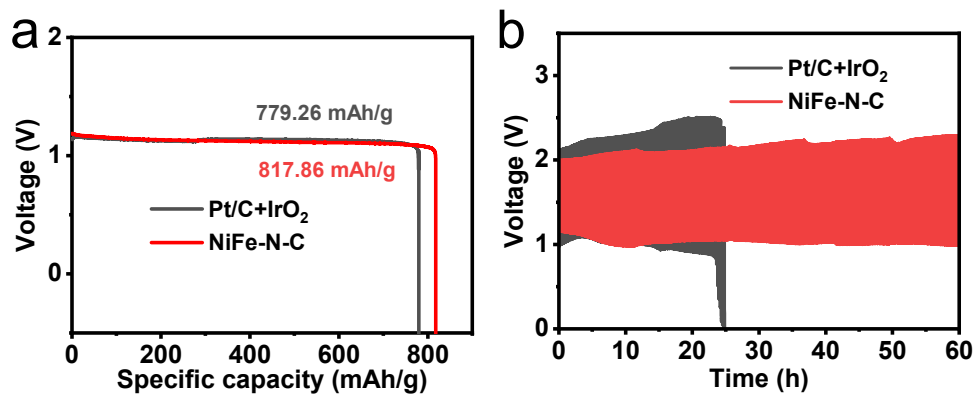

**Figure S28.** (a) Specific capacities at 10 mA cm<sup>-2</sup> of NiFe-N-C and Pt/C+IrO<sub>2</sub>-based Zinc-air batteries. (b) Galvanostatic cycling stabilities of Pt/C+IrO<sub>2</sub> and NiFe-N-C based Zinc-air batteries at 20 mA cm<sup>-2</sup>.

**Table S1.** The mass ratio of different atoms for Ni-N-C, Fe-N-C and NiFe-N-C based on HAADF-STEM-EDS analysis.

| Samples  | Ni%  | Fe%  | C%    | N%   |
|----------|------|------|-------|------|
| Ni-N-C   | 0.41 | NA   | 97.74 | 1.85 |
| Fe-N-C   | NA   | 0.73 | 97.85 | 1.42 |
| NiFe-N-C | 0.85 | 0.92 | 94.74 | 3.49 |

**Table S2.** The calculated atomic ratio of different atoms in Ni-N-C, Fe-N-C and NiFe-N-C based on XPS analysis.

| Samples  | Ni%  | Fe%  | C%    | N%   | O%   |
|----------|------|------|-------|------|------|
| Ni-N-C   | 0.71 | NA   | 91.47 | 5.39 | 2.02 |
| Fe-N-C   | NA   | 0.65 | 93.09 | 3.78 | 2.48 |
| NiFe-N-C | 0.64 | 0.84 | 88.22 | 7.19 | 3.10 |

**Table S3.** Structural parameters at the Ni K-edge extracted from EXAFS fittings ( $S_0^2=0.85$ ).

| Sample  | Path   | CN              | R(Å) | $\sigma^2(10^{-3}\text{Å}^2)$ | $\Delta E_0(\text{eV})$ | R factor |
|---------|--------|-----------------|------|-------------------------------|-------------------------|----------|
| Ni foil | Ni-Ni  | 12 <sup>*</sup> | 2.48 | 6.15                          | -4.398                  | 0.0032   |
|         | Ni-O   | 6 <sup>*</sup>  | 2.08 | 5.85                          | 1.402                   |          |
| NiO     | Ni-Ni  | 12.69           | 2.95 | 6.33                          | -0.747                  | 0.0124   |
|         | Ni-N1  | 4 <sup>*</sup>  | 1.91 | 2.65                          | 1.309                   |          |
| NiPc    | Ni-C   | 8 <sup>*</sup>  | 2.94 | 4.90                          | -0.273                  | 0.0103   |
|         | Ni-N2  | 4 <sup>*</sup>  | 3.28 | 2.27                          | 0.434                   |          |
| Ni-N-C  | Ni-N   | 3.50            | 1.85 | 2.58                          | -6.633                  | 0.0161   |
|         | Ni-Ni1 | 1.01            | 2.33 | 3.77                          | -6.633                  |          |

|          |        |      |      |      |        |        |
|----------|--------|------|------|------|--------|--------|
|          | Ni-C   | 3.55 | 2.59 | 3.77 | -6.633 |        |
|          | Ni-Ni2 | 1.70 | 2.87 | 3.77 | -6.633 |        |
|          | Ni-N   | 4.50 | 1.89 | 6.25 | -0.897 |        |
| NiFe-N-C | Ni-Fe1 | 0.50 | 2.35 | 6.25 | -0.897 | 0.0118 |
|          | Ni-Fe2 | 1.17 | 2.90 | 6.25 | -0.897 |        |
|          | Ni-C   | 1.46 | 2.92 | 6.25 | -0.897 |        |

$S_0^2$ , CN and R are the amplitude reduction factor, the coordination number and bond length of atoms, respectively.  $\sigma^2$  represents Debye-Waller factor (a measure of thermal and static disorder in absorber-scatterer distances);  $\Delta E_0$  is edge-energy shift (the difference between the zero kinetic energy value of the sample and that of the theoretical model). R factor displays the goodness of the fitting. \* This value was fixed during EXAFS fitting. Error bounds of the structural parameters obtained from EXAFS fitting were about CN  $\pm$  20%, R  $\pm$  1%,  $\sigma^2 \pm$  20% and  $\Delta E_0 \pm$  20%, respectively.

**Table S4.** Structural parameters at the Fe K-edge extracted from EXAFS fittings ( $S_0^2=0.85$ ).

| Sample                         | Path  | CN   | R(Å) | $\sigma^2(10^{-3}\text{Å}^2)$ | $\Delta E_0(\text{eV})$ | R factor |
|--------------------------------|-------|------|------|-------------------------------|-------------------------|----------|
| Fe foil                        | Fe-Fe | 8*   | 2.47 | 5.59                          | -1.063                  | 0.0027   |
|                                | Fe-Fe | 6*   | 2.84 | 6.56                          | -2.836                  |          |
| Fe <sub>2</sub> O <sub>3</sub> | Fe-O  | 5.27 | 1.98 | 12.28                         | -0.282                  | 0.0080   |
|                                | Fe-Fe | 6.08 | 2.99 | 9.35                          | 4.129                   |          |
| FePc                           | Fe-N1 | 4*   | 1.95 | 4.45                          | 6.490                   | 0.0200   |
|                                | Fe-C  | 8*   | 2.99 | 3.91                          | 7.966                   |          |
|                                | Fe-N2 | 4*   | 3.29 | 6.25                          | 7.966                   |          |
| Fe-N-C                         | Fe-N  | 4.00 | 1.97 | 10.03                         | -1.961                  | 0.0196   |
|                                | Fe-Fe | 0.74 | 2.43 | 0.12                          | -1.961                  |          |
|                                | Fe-C1 | 5.64 | 2.66 | 0.12                          | -1.961                  |          |
|                                | Fe-C2 | 3.85 | 2.91 | 0.12                          | -1.961                  |          |
| NiFe-N-C                       | Fe-N  | 4.00 | 1.92 | 10.12                         | -6.313                  | 0.0227   |
|                                | Fe-Fe | 1.29 | 2.49 | 10.12                         | 6.666                   |          |
|                                | Fe-C1 | 6.00 | 2.60 | 10.12                         | -6.313                  |          |
|                                | Fe-C2 | 2.60 | 3.00 | 10.12                         | 6.666                   |          |

$S_0^2$ , CN and R are the amplitude reduction factor, the coordination number and bond length of atoms, respectively.  $\sigma^2$  represents Debye-Waller factor (a measure of thermal and static disorder in absorber-scatterer distances);  $\Delta E_0$  is edge-energy shift (the difference between the zero kinetic energy value of the sample and that of the theoretical model). R factor displays the goodness of the fitting. \* This value was fixed during EXAFS fitting. Error bounds of the structural parameters obtained from EXAFS fitting were about CN  $\pm$  20%, R  $\pm$  1%,  $\sigma^2 \pm$  20% and  $\Delta E_0 \pm$  20%, respectively.

**Table S5.** The Mössbauer parameters and assignments for different Fe species.

| Sample   | Fe species | IS (mm/s) | QS (mm/s) | LW (mm/s) | Area (%) | Assignment                      |
|----------|------------|-----------|-----------|-----------|----------|---------------------------------|
| NiFe-N-C | D1         | 0.39      | 0.89      | 0.70      | 46.30    | Fe-N <sub>4</sub> , low spin    |
|          | D2         | 0.50      | 2.13      | 0.56      | 53.70    | Fe-N <sub>4</sub> , medium spin |

**Table S6.** Comparison of ORR/OER performance of NiFe-N-C and other reported bifunctional electrocatalysts.

| Catalysts | $E(\text{V})$ |              | $\Delta E(\text{V})$ | Tafel slope (mV dec <sup>-1</sup> ) |     | Cyclic Durability |     | Ref. |
|-----------|---------------|--------------|----------------------|-------------------------------------|-----|-------------------|-----|------|
|           | $E_{1/2}$     | $E_{j_{10}}$ |                      | ORR                                 | OER | ORR               | OER |      |

|                                                           |      |      |      |       |       |       |       |                                                              |
|-----------------------------------------------------------|------|------|------|-------|-------|-------|-------|--------------------------------------------------------------|
| NiFe-N-C                                                  | 0.87 | 1.55 | 0.68 | 33    | 36    | 50000 | 90000 | This work                                                    |
| Co-NC@LDH                                                 | 0.80 | 1.62 | 0.82 | 53.96 | 79.65 | NA    | 4000  | <i>Chem. Eng. J.</i> <b>2020</b> , 399,<br>125718            |
| Fe-NiNC-50                                                | 0.94 | 1.68 | 0.74 | 55    | 54    | 5000  | 1500  | <i>Nano Energy</i> <b>2020</b> , 71,<br>104597               |
| Ni,Fe-DSAs/NCs                                            | 0.89 | 1.61 | 0.72 | 64    | NA    | 10000 | 2000  | <i>ACS Nano</i> <b>2023</b> , 17, 8622-<br>8633              |
| Fe <sub>1</sub> Co <sub>1</sub> -CNF                      | 0.87 | 1.73 | 0.86 | 88    | 102   | NA    | 1000  | <i>Nano Energy</i> <b>2021</b> , 87,<br>106147               |
| FeCoO <sub>x</sub> /N-MWCNTs                              | 0.88 | 1.61 | 0.81 | NA    | NA    | NA    | NA    | <i>ChemElectroChem</i> <b>2021</b> , 8,<br>2803              |
| H <sub>2</sub> PO <sub>2</sub> /FeNi-LDH-V <sub>2</sub> C | 0.80 | 1.48 | 0.68 | 52.8  | 46.5  | NA    | NA    | <i>Appl. Catal. B: Environ.</i><br><b>2021</b> , 297, 120474 |
| IrCo-N-C                                                  | 0.91 | 1.56 | 0.65 | 54    | 79    | 10000 | 2000  | <i>ACS Catal.</i> <b>2021</b> , 11, 8837-<br>8846            |
| Fe SAs HS                                                 | 0.86 | 1.56 | 0.71 | 90    | 68.6  | 5000  | NA    | <i>Angew. Chem. Int. Ed.</i><br><b>2023</b> , 62, e202304229 |
| CoO <sub>x</sub> @CoN <sub>y</sub> /NCNF550               | 0.78 | 1.69 | 0.91 | NA    | 85.6  | NA    | NA    | <i>ACS Nano</i> <b>2021</b> , 15, 7,<br>11218–11230          |
| Co SA/NCFs                                                | 0.85 | 1.61 | 0.76 | 49.3  | NA    | 50000 | NA    | <i>Nano Lett.</i> <b>2022</b> , 22, 2497-<br>2505            |
| Co <sub>9</sub> S <sub>8</sub> @N, S-C                    | 0.88 | 1.53 | 0.65 | NA    | 82.51 | 10000 | 10000 | <i>Adv. Energy Mater.</i> <b>2021</b> ,<br>2101249           |
| FeNiSAs/NC                                                | 0.84 | 1.52 | 0.68 | NA    | 52.68 | NA    | NA    | <i>Adv. Energy Mater.</i> <b>2021</b> ,<br>11, 2101242       |
| Ni-N <sub>4</sub> /GHSs/Fe-N <sub>4</sub>                 | 0.83 | 1.62 | 0.79 | 55    | 81    | NA    | NA    | <i>Adv. Mater.</i> <b>2020</b> , 32,<br>2003134              |
| Pd/FeCo                                                   | 0.84 | 1.55 | 0.71 | NA    | 54    | NA    | NA    | <i>Adv. Energy Mater.</i> <b>2020</b> ,<br>2002204           |

|                                           |               |               |      |       |       |      |      |                                                             |
|-------------------------------------------|---------------|---------------|------|-------|-------|------|------|-------------------------------------------------------------|
| meso/micro-FeCo-N <sub>x</sub> -CN-30     | 0.89          | 1.67          | 0.78 | NA    | 57    | NA   | NA   | <i>Angew. Chem. Int. Ed.</i><br><b>2018</b> , 57, 1856–1862 |
| A-FeCo@NCNs                               | 0.87          | 1.67          | 0.80 | 98    | NA    | NA   | NA   | <i>J. Catal.</i> <b>2021</b> , 397, 223–232                 |
| 3D Co/N-C                                 | 0.84          | 1.56          | 0.72 | 51    | NA    | 5000 | 5000 | <i>Chem. Eng. J.</i> <b>2022</b> , 433, 134500              |
| Ni-NCNT-750                               | 0.88          | 1.61          | 0.73 | NA    | 202   | NA   | NA   | <i>Small</i> <b>2020</b> , 2002518                          |
| Fe <sub>1</sub> Co <sub>3</sub> -NC-1100  | 0.88          | 1.58          | 0.70 | 69.06 | 99.93 | NA   | 5000 | <i>ACS Catal.</i> <b>2022</b> , 12, 1216-1227               |
| FeNiCo@NC-P                               | 0.84          | 1.54          | 0.70 | 53    | 64    | NA   | NA   | <i>Adv. Funct. Mater.</i> <b>2019</b> , 1908167             |
| Co-N <sub>x</sub> -YSC-600/CC             | 0.8<br>(4.67) | 1.66<br>(4.5) | NA   | 85.3  | 186.1 | NA   | NA   | <i>Nano Energy</i> <b>2021</b> , 89, 106314                 |
| Co <sub>1</sub> -PNC/Ni <sub>1</sub> -PNC | 0.88          | 1.62          | 0.74 | 63    | 117   | 5000 | NA   | <i>Nano Res.</i> <b>2021</b> , 14(10): 3482–3488            |
| RuFe@NC-900(5h)                           | 0.86          | 1.58          | 0.73 | 63.2  | 140   | 5000 | NA   | <i>ACS Catal.</i> <b>2022</b> , 12, 1718-1731               |
| CoNC SAC                                  | 0.86          | 1.65          | 0.79 | 47.9  | 106.9 | NA   | NA   | <i>Sci. Adv.</i> <b>2022</b> , 8, eabn5091                  |
| Fe/SNCFs-NH <sub>3</sub>                  | 0.89          | 1.68          | 0.79 | 70.82 | NA    | 6000 | NA   | <i>Adv. Mater.</i> <b>2021</b> , 2105410                    |
| S-CFZ                                     | 0.85          | 1.53          | 0.68 | 79    | NA    | NA   | NA   | <i>J. Am. Chem. Soc.</i> <b>2022</b> , 144, 11, 4783–4791   |

**Table S7.** The Nyquist plots fitting results of NiFe-N-C.

|             | Potential (V) | R <sub>s</sub> (Ω) | C <sub>dl</sub> (F) | R <sub>ct</sub> (Ω) |
|-------------|---------------|--------------------|---------------------|---------------------|
| OER process | 1.45 V        | 41.71              | 0.00016051          | 45536               |
|             | 1.50 V        | 40.13              | 0.00020947          | 8266                |
|             | 1.52 V        | 41.11              | 0.00021533          | 1487                |
|             | 1.54 V        | 41.65              | 0.00022117          | 366.4               |
|             | 1.56 V        | 40.47              | 0.00025406          | 137.6               |
|             | 1.58 V        | 40.43              | 0.00031138          | 73.79               |
|             | 1.60 V        | 40.39              | 0.00038268          | 49.66               |
|             | 1.62 V        | 40.48              | 0.00052345          | 37.86               |

|             |        |       |            |       |
|-------------|--------|-------|------------|-------|
| ORR process | 1.64 V | 39.65 | 0.00060902 | 30.77 |
|             | 1.66 V | 40.27 | 0.0005587  | 25.61 |
|             | 1.68 V | 39.80 | 0.00071074 | 22.83 |
|             | 0.95 V | 47.96 | 0.0001608  | 18733 |
|             | 0.90 V | 45.31 | 0.00019643 | 366.1 |
|             | 0.87 V | 40.19 | 0.00029126 | 117.9 |
|             | 0.85 V | 39.46 | 0.00034421 | 83.28 |
|             | 0.83 V | 38.66 | 0.00042797 | 72.83 |
|             | 0.81 V | 38.39 | 0.00054161 | 74.86 |

**Table S8.** Comparison of Zn-air performance based on NiFe-N-C and other reported bifunctional electrocatalysts in literature.

| Catalysts                                                 | Open-circuit voltage (V) | Peak power density (mW cm <sup>-2</sup> ) | Specific capacity (mAh g <sub>Zn</sub> <sup>-1</sup> ) | Battery Stability (h) | Ref.                                                      |
|-----------------------------------------------------------|--------------------------|-------------------------------------------|--------------------------------------------------------|-----------------------|-----------------------------------------------------------|
| NiFe-N-C                                                  | 1.59                     | 153                                       | 818                                                    | 700 (10)              | This work                                                 |
| Co-NC@LDH                                                 | 1.41                     | 107.8                                     | 806                                                    | 300 (5)               | <i>Chem. Engin. J.</i> <b>2020</b> , 399, 125718          |
| Fe-NiNC-50                                                | 1.41                     | 200                                       | 932.66                                                 | 100 (2)               | <i>Nano Energy</i> <b>2020</b> , 71, 104597               |
| Fe <sub>1</sub> Co <sub>1</sub> -CNF                      | 1.45                     | 201.7                                     | 814                                                    | 200 (20)              | <i>Nano Energy</i> <b>2021</b> , 87, 106147               |
| Ni <sub>1</sub> Fe-DSAs/NCs                               | 1.49                     | 217.5                                     | 780.1                                                  | 500 (5)               | <i>ACS Nano</i> <b>2023</b> , 17, 8622-8633               |
| H <sub>2</sub> PO <sub>2</sub> /FeNi-LDH-V <sub>2</sub> C | 1.42                     | 137                                       | NA                                                     | 100 (5)               | <i>Appl. Catal. B: Environ.</i> <b>2021</b> , 297, 120474 |
| IrCo-N-C                                                  | 1.46                     | 138.8                                     | NA                                                     | 225 (5)               | <i>ACS Catal.</i> <b>2021</b> , 11, 8837-8846             |
| Co SA/NCFs                                                | 1.53                     | 154.5                                     | 796                                                    | 600 (10)              | <i>Nano Lett.</i> <b>2022</b> , 22, 2497-2505             |
| Co <sub>9</sub> S <sub>8</sub> @N, S-C                    | 1.51                     | 259                                       | 991                                                    | 110 (10)              | <i>Adv. Energy Mater.</i> <b>2021</b> , 2101249           |
| Fe SAs HS                                                 | NA                       | 170                                       | 785                                                    | 65 (20)               | <i>Angew. Chem. Int. Ed.</i> <b>2023</b> , 62, e202304229 |
| FeNi SAs/NC                                               | 1.45                     | 42.22                                     | 779.4                                                  | 20 (1)                | <i>Adv. Energy Mater.</i> <b>2021</b> , 11, 2101242       |
| Ni-N <sub>4</sub> /GHSs/Fe-N <sub>4</sub>                 | 1.45                     | NA                                        | 970.4                                                  | 200 (10)              | <i>Adv. Mater.</i> <b>2020</b> , 32, 2003134              |
| Pd/FeCo                                                   | 1.42                     | 117                                       | 854                                                    | 200 (10)              | <i>Adv. Energy Mater.</i> <b>2020</b> , 2002204           |
| meso/micro-FeCo-N <sub>x</sub> -CN-30                     | 1.40                     | 150                                       | NA                                                     | 40 (5)                | <i>Angew. Chem. Int. Ed.</i> <b>2018</b> , 57, 1856–1862  |
| A-FeCo@NCNs                                               | 1.46                     | 132                                       | 736.2                                                  | 167 (2)               | <i>J. Catal.</i> <b>2021</b> , 397, 223–232               |
| 3D Co/N-C                                                 | NA                       | 239                                       | NA                                                     | 300 (10)              | <i>Chem. Eng. J.</i> <b>2022</b> , 433, 134500            |
| Ni-NCNT-750                                               | 1.48                     | 120                                       | 834.1                                                  | 375 (10)              | <i>Small</i> <b>2020</b> , 2002518                        |
| Fe <sub>1</sub> Co <sub>3</sub> -NC-1100                  | 1.48                     | 372                                       | NA                                                     | 190 (10)              | <i>ACS Catal.</i> <b>2022</b> , 12, 1216-1227             |
| FeNiCo@NC-P                                               | 1.36                     | 112                                       | NA                                                     | 120 (10)              | <i>Adv. Funct. Mater.</i> <b>2019</b> , 1908167           |
| Co-N <sub>x</sub> -YSC-600/CC                             | 1.345                    | 55.3                                      | NA                                                     | 200 (10)              | <i>Nano Energy</i> <b>2021</b> , 89, 106314               |
| Co <sub>1</sub> -PNC/Ni <sub>1</sub> -PNC                 | 1.59                     | 252                                       | 874                                                    | 45 (10)               | <i>Nano Res.</i> <b>2021</b> , 14(10): 3482–3488          |
| RuFe@NC-900(5h)                                           | 1.43                     | NA                                        | 752                                                    | 30 (10)               | <i>ACS Catal.</i> <b>2022</b> , 12, 1718-1731             |
| CoNC SAC                                                  | NA                       | 161.8                                     | 795                                                    | 80 (5)                | <i>Sci. Adv.</i> <b>2022</b> , 8, eabn5091                |
| Fe/SNCFs-NH <sub>3</sub>                                  | 1.38                     | 255.84                                    | NA                                                     | 1000 (1)              | <i>Adv. Mater.</i> <b>2021</b> , 2105410                  |
| S-CFZ                                                     | NA                       | 178                                       | NA                                                     | 525 (25)              | <i>J. Am. Chem. Soc.</i> <b>2022</b> , 144, 11, 4783–4791 |
